# Supplementary material
Source: MDPI journal article supplement (https://www.mdpi.com/2077-0472/11/7/594)
Supplement: s1 [file s1]

**Table S1.** Cd accumulation of in leaf and shoot, tuber, root of *B. striata* under Cd treatment control, I, II, III and IV.

|                     | Cd treatment | T <sub>1-7</sub> | T <sub>1-8</sub> | T <sub>1-9</sub> | T <sub>2-7</sub> | T <sub>2-8</sub> | T <sub>2-9</sub> |
|---------------------|--------------|------------------|------------------|------------------|------------------|------------------|------------------|
| Leaf and shoot (µg) | control      | 0.50 ± 0.04b     | 0.75 ± 0.11d     | 1.05 ± 0.17b     | 4.44 ± 1.14c     | 7.31 ± 0.21c     | 6.2 ± 1.13b      |
|                     | I            | 0.56 ± 0.02b     | 0.8 ± 0.05cd     | 1.19 ± 0.13b     | 3.87 ± 1.10c     | 9.54 ± 3.15bc    | 14.72 ± 5.49b    |
|                     | II           | 0.87 ± 0.18b     | 1.03 ± 0.16c     | 1.56 ± 0.65b     | 14.50 ± 2.73b    | 18.24 ± 5.75b    | 18.64 ± 2.35b    |
|                     | III          | 1.23 ± 0.14b     | 1.92 ± 0.15b     | 3.14 ± 1.18b     | 40.03 ± 7.91a    | 54.83 ± 10.08a   | 62.69 ± 14.05a   |
|                     | IV           | 3.77 ± 1.01a     | 6.76 ± 0.21a     | 8.06 ± 2.23a     | 46.81 ± 3.72a    | 58.35 ± 2.94a    | 68.75 ± 1.29a    |
| Tuber (µg)          | control      | 0.37 ± 0.02c     | 0.47 ± 0.01b     | 0.51 ± 0.01b     | 1.32 ± 0.1d      | 1.94 ± 0.2d      | 2.33 ± 0.18d     |
|                     | I            | 0.29 ± 0.07c     | 0.54 ± 0.21b     | 0.74 ± 0.18b     | 3.61 ± 0.34d     | 4.56 ± 0.29d     | 6.44 ± 0.87d     |
|                     | II           | 0.65 ± 0.09b     | 0.98 ± 0.33b     | 1.73 ± 0.51b     | 11.91 ± 1.6c     | 14.98 ± 3.32c    | 19.97 ± 2.52c    |
|                     | III          | 0.65 ± 0.05b     | 1.81 ± 0.43b     | 2.17 ± 0.38b     | 22.23 ± 5.86b    | 32.95 ± 8.15b    | 42.33 ± 7.11b    |
|                     | IV           | 4.48 ± 0.04a     | 7.66 ± 1.44a     | 13.04 ± 1.94a    | 56.85 ± 2.75a    | 57.51 ± 6.19a    | 62.51 ± 3.81a    |
| Root (µg)           | control      | 0.92 ± 0.60c     | 1.35 ± 0.20c     | 2.50 ± 0.55c     | 3.92 ± 0.88d     | 5.62 ± 1.72d     | 6.96 ± 0.25d     |
|                     | I            | 1.14 ± 0.06c     | 1.57 ± 0.30c     | 3.05 ± 0.65c     | 15.11 ± 1.57d    | 20.13 ± 3.65d    | 21.39 ± 2.99d    |
|                     | II           | 2.34 ± 0.04c     | 4.29 ± 0.94c     | 6.69 ± 0.48c     | 35.4 ± 5.08c     | 47.30 ± 7.71c    | 55.64 ± 3.59c    |
|                     | III          | 13.86 ± 2.44b    | 20.33 ± 3.18b    | 33.50 ± 4.64b    | 214.82 ± 13.14b  | 207.4 ± 27.51b   | 231.6 ± 6.52b    |
|                     | IV           | 93.1 ± 7.60a     | 129.77 ± 15.1a   | 175.14 ± 30.81a  | 666.45 ± 8.15a   | 772.2 ± 14.89a   | 749.15 ± 37.99a  |

Values are demonstrated by means ± SD ( $n=3$ ). Significant effects of each treatment on values for biomass are denoted by different lowercase letters (one-way ANOVA,  $p < 0.05$ ). T<sub>i-j</sub> means *B. striata* harvested at a certain point ( $i = 1, 2$ , represents the year after transplanting;  $j = 7, 8, 9$ , represents the month for sampling).

**Table S2.** K content in leaf, shoot, tuber, root of *B. striata* under Cd treatment control, I, II, III and IV.

| Cd treatment     |         | T <sub>1-7</sub> | T <sub>1-8</sub> | T <sub>1-9</sub> | T <sub>2-7</sub> | T <sub>2-8</sub> | T <sub>2-9</sub> |
|------------------|---------|------------------|------------------|------------------|------------------|------------------|------------------|
| Leaf<br>(mg/kg)  | control | 17.94 ± 0.45c    | 25.95 ± 0.94b    | 22.6 ± 1.07b     | 19.1 ± 1.51ns    | 16.15 ± 0.45c    | 22.68 ± 1.10cd   |
|                  | I       | 21.3 ± 0.82ab    | 30.79 ± 4.81a    | 21.46 ± 0.84bc   | 19.79 ± 2.02ns   | 16.16 ± 0.73c    | 21.71 ± 1.55d    |
|                  | II      | 19.29 ± 2.01bc   | 26.3 ± 1.03b     | 18.36 ± 0.99d    | 20.11 ± 0.55ns   | 25.61 ± 0.98b    | 24.01 ± 0.57bc   |
|                  | III     | 19.58 ± 1.03bc   | 19.66 ± 0.67c    | 19.95 ± 0.45cd   | 20.54 ± 1.07ns   | 27.68 ± 1.57a    | 25.56 ± 1.17ab   |
|                  | IV      | 22.69 ± 0.47a    | 29.48 ± 1ab      | 29.74 ± 1.6a     | 21.55 ± 1.05ns   | 27.29 ± 0.8ab    | 26.4 ± 1.02a     |
| Shoot<br>(mg/kg) | control | 29.34 ± 2.7a     | 30.57 ± 2.06a    | 37.87 ± 5.05a    | 29.64 ± 2.95a    | 28.52 ± 1.73b    | 38.16 ± 2.03b    |
|                  | I       | 27.50 ± 4.00a    | 29.91 ± 2.90a    | 27.22 ± 2.13b    | 24.58 ± 2.63b    | 38.3 ± 1.97a     | 34.20 ± 3.47b    |
|                  | II      | 18.50 ± 3.89b    | 19.87 ± 2.52c    | 18.57 ± 3.56c    | 25.61 ± 1.95ab   | 38.03 ± 0.79a    | 43.84 ± 3.59a    |
|                  | III     | 15.4 ± 5.00b     | 8.71 ± 0.61d     | 10.55 ± 1.94d    | 19.59 ± 1.99c    | 34.53 ± 2.01a    | 38.56 ± 1.95b    |
|                  | IV      | 14.61 ± 1.06b    | 25.76 ± 2.18b    | 21.34 ± 4.5bc    | 24.76 ± 2.18b    | 38.16 ± 2.95a    | 35.74 ± 2.34b    |
| Tuber<br>(mg/kg) | control | 14.33 ± 1.21a    | 16.68 ± 2.00a    | 16.64 ± 0.95bc   | 15.31 ± 1.24a    | 14.20 ± 2.01c    | 12.42 ± 0.48c    |
|                  | I       | 13.20 ± 1.64ab   | 13.58 ± 1.06b    | 18.86 ± 1.53ab   | 12.54 ± 1.00c    | 12.48 ± 1.88c    | 17.35 ± 0.97b    |
|                  | II      | 11.21 ± 1.43b    | 18.40 ± 1.49a    | 14.71 ± 1.01cd   | 13.20 ± 0.57bc   | 14.86 ± 1.82bc   | 16.70 ± 0.94b    |
|                  | III     | 10.28 ± 2.01b    | 12.12 ± 1.5b     | 12.61 ± 0.95d    | 13.59 ± 1.04abc  | 18.49 ± 2.44ab   | 24.86 ± 3.02a    |
|                  | IV      | 11.44 ± 1.11b    | 17.87 ± 1.42a    | 20.87 ± 2.51a    | 14.57 ± 0.9ab    | 19.69 ± 2.67a    | 21.84 ± 1.66a    |
| Root<br>(mg/kg)  | control | 21.73 ± 1.11a    | 25.68 ± 2.47a    | 21.91 ± 1.6b     | 26.27 ± 1.95c    | 37.06 ± 1.81b    | 46.82 ± 2.13a    |
|                  | I       | 21.61 ± 0.85a    | 20.42 ± 4.6bc    | 23.07 ± 1.76b    | 30.12 ± 3.08b    | 37.56 ± 4.95b    | 51.87 ± 1.52a    |
|                  | II      | 18.47 ± 1.05b    | 17.4 ± 1.10c     | 27.97 ± 3.14a    | 38.76 ± 0.86a    | 48.42 ± 2.45a    | 51.34 ± 4.53a    |
|                  | III     | 20.39 ± 1.03ab   | 17.63 ± 0.86c    | 12.53 ± 1.01c    | 16.34 ± 2.00d    | 44.43 ± 4.76a    | 49.82 ± 2.95a    |
|                  | IV      | 19.18 ± 1.55b    | 23.53 ± 1.45ab   | 12.73 ± 1.04c    | 12.36 ± 0.47e    | 26.04 ± 2.23c    | 30.01 ± 5.08b    |

Values are demonstrated by means ± SD ( $n=3$ ). Significant effects of each treatment on values for biomass are denoted by different lowercase letters (one-way ANOVA,  $p < 0.05$ ). T<sub>i-j</sub> means *Bletilla striata* harvested at a certain point (i = 1,2, represents the year after transplanting; j = 7,8,9, represents month for sampling).

**Table S3.** Mg content in leaf, shoot, tuber, root of *B. striata* under Cd treatment control, I, II, III and IV.

| Cd treatment     |         | T <sub>1-7</sub> | T <sub>1-8</sub> | T <sub>1-9</sub> | T <sub>2-7</sub> | T <sub>2-8</sub> | T <sub>2-9</sub> |
|------------------|---------|------------------|------------------|------------------|------------------|------------------|------------------|
| Leaf<br>(mg/kg)  | control | 2.44 ± 0.02ns    | 2.66 ± 0.11b     | 2.77 ± 0.27ns    | 2.14 ± 0.08ab    | 1.55 ± 0.55b     | 2.17 ± 0.34ns    |
|                  | I       | 2.54 ± 0.16ns    | 2.14 ± 0.06c     | 2.84 ± 0.18ns    | 1.97 ± 0.16b     | 1.87 ± 0.45ab    | 2.21 ± 0.49ns    |
|                  | II      | 2.57 ± 0.21ns    | 2.94 ± 0.29ab    | 2.86 ± 0.26ns    | 2.33 ± 0.31ab    | 1.96 ± 0.31ab    | 2.07 ± 0.11ns    |
|                  | III     | 2.73 ± 0.18ns    | 3.16 ± 0.13a     | 2.79 ± 0.26ns    | 2.34 ± 0.14ab    | 2.2 ± 0.11ab     | 2.43 ± 0.55ns    |
|                  | IV      | 2.41 ± 0.19ns    | 1.98 ± 0.19c     | 2.76 ± 0.1ns     | 2.53 ± 0.35a     | 2.31 ± 0.26a     | 2.14 ± 0.34ns    |
| Shoot<br>(mg/kg) | control | 2.12 ± 0.06ns    | 2.16 ± 0.68ns    | 2.53 ± 0.19a     | 2.05 ± 0.2c      | 2.28 ± 0.12b     | 2.57 ± 0.16a     |
|                  | I       | 2.12 ± 0.17ns    | 2.12 ± 0.49ns    | 1.96 ± 0.18b     | 2.71 ± 0.26b     | 2.58 ± 0.2ab     | 1.93 ± 0.08b     |
|                  | II      | 1.98 ± 0.24ns    | 2.21 ± 0.49ns    | 1.79 ± 0.28b     | 2.97 ± 0.23ab    | 2.69 ± 0.16a     | 3.21 ± 0.37a     |
|                  | III     | 2.01 ± 0.58ns    | 2.14 ± 0.14ns    | 2.03 ± 0.21b     | 3.03 ± 0.26ab    | 2.76 ± 0.2a      | 3.1 ± 0.52a      |
|                  | IV      | 1.96 ± 0.21ns    | 1.94 ± 0.39ns    | 1.88 ± 0.24b     | 3.47 ± 0.37a     | 2.88 ± 0.12a     | 2.84 ± 0.36a     |
| Tuber<br>(mg/kg) | control | 2.17 ± 0.31a     | 2.31 ± 0.16abc   | 2.46 ± 0.07b     | 2.24 ± 0.2b      | 2.25 ± 0.27b     | 3.11 ± 0.1b      |
|                  | I       | 2 ± 0.45ab       | 2.04 ± 0.09c     | 2.59 ± 0.12b     | 2.25 ± 0.23b     | 3.49 ± 0.14a     | 2.62 ± 0.07c     |
|                  | II      | 1.93 ± 0.13b     | 2.58 ± 0.16a     | 2.84 ± 0.16a     | 3.13 ± 0.36a     | 3 ± 0.39a        | 2.86 ± 0.11bc    |
|                  | III     | 1.83 ± 0.17b     | 2.4 ± 0.25ab     | 2.6 ± 0.12b      | 2.97 ± 0.56a     | 3.47 ± 0.26a     | 2.62 ± 0.15c     |
|                  | IV      | 2.61 ± 0.2b      | 2.11 ± 0.1bc     | 2.15 ± 0.16c     | 3.25 ± 0.27a     | 3.11 ± 0.1a      | 3.44 ± 0.33a     |
| Root<br>(mg/kg)  | control | 5.21 ± 0.17a     | 5.06 ± 0.14a     | 4.95 ± 0.36a     | 3.64 ± 0.23b     | 4.03 ± 0.21c     | 6.09 ± 0.37ab    |
|                  | I       | 4.96 ± 0.63a     | 4.67 ± 0.65a     | 5.19 ± 0.37a     | 3.59 ± 0.27b     | 6.01 ± 0.3b      | 6.08 ± 0.7ab     |
|                  | II      | 3.77 ± 0.35b     | 3.82 ± 0.18b     | 4.23 ± 0.68b     | 5.41 ± 0.18a     | 5.87 ± 0.58b     | 5.65 ± 0.21b     |
|                  | III     | 4.84 ± 0.47a     | 4.93 ± 0.5a      | 4.99 ± 0.04a     | 4.17 ± 0.31b     | 5.41 ± 0.37b     | 6.65 ± 0.3ab     |
|                  | IV      | 4.9 ± 0.17a      | 5.07 ± 0.12a     | 3.99 ± 0.13b     | 4.07 ± 0.46b     | 6.99 ± 0.19a     | 6.23 ± 0.29a     |

Values are demonstrated by means ± SD ( $n = 3$ ). Significant effects of each treatment on values for biomass are denoted by different lowercase letters (one-way ANOVA,  $p < 0.05$ ). T<sub>i-j</sub> means *Bletilla striata* harvested at a certain point ( $i = 1, 2$ , represents the year after transplanting;  $j = 7, 8, 9$ , represents the month for sampling).

**Table S4.** Ca content in leaf ,shoot, tuber, root of *B. striata* under Cd treatment control, I, II, III and IV.

| Cd treatment     |         | T <sub>1-7</sub> | T <sub>1-8</sub> | T <sub>1-9</sub> | T <sub>2-7</sub> | T <sub>2-8</sub> | T <sub>2-9</sub> |
|------------------|---------|------------------|------------------|------------------|------------------|------------------|------------------|
| Leaf<br>(mg/kg)  | control | 11.99 ± 0.44ns   | 11.19 ± 0.47b    | 12.52 ± 0.68a    | 14.63 ± 0.41a    | 11.5 ± 0.72b     | 14.03 ± 1.61ns   |
|                  | I       | 12.21 ± 0.34ns   | 10.94 ± 0.27b    | 12.6 ± 0.08a     | 10.18 ± 0.39b    | 12.18 ± 0.44b    | 13.95 ± 1.89ns   |
|                  | II      | 12.13 ± 0.42ns   | 11.12 ± 0.47b    | 12.36 ± 0.29a    | 13.82 ± 0.54a    | 15.14 ± 0.8a     | 13.85 ± 0.87ns   |
|                  | III     | 12.25 ± 0.23ns   | 12.68 ± 0.89a    | 9.62 ± 0.81b     | 10.01 ± 0.34b    | 15.35 ± 0.93a    | 15.1 ± 1.4ns     |
|                  | IV      | 11.54 ± 0.85ns   | 11.15 ± 0.56b    | 12.03 ± 0.34a    | 10.21 ± 0.67b    | 15.14 ± 0.7a     | 16.35 ± 0.89ns   |
| Shoot<br>(mg/kg) | control | 12.79 ± 0.85b    | 13.57 ± 0.79b    | 16.77 ± 0.35b    | 12.17 ± 0.45b    | 16.27 ± 1.19b    | 16.9 ± 2.69ns    |
|                  | I       | 12.9 ± 0.85b     | 13.92 ± 0.69b    | 16.63 ± 0.26b    | 13.94 ± 0.4a     | 16.71 ± 1.44b    | 16.63 ± 1.87ns   |
|                  | II      | 12.73 ± 1.1b     | 13.75 ± 0.57b    | 17.38 ± 0.88b    | 13.66 ± 1.07a    | 15.58 ± 0.88b    | 18.3 ± 1.9ns     |
|                  | III     | 13.37 ± 0.34b    | 17.1 ± 0.16a     | 16.61 ± 0.57b    | 14.56 ± 0.93a    | 14.79 ± 0.88b    | 19.93 ± 2.74ns   |
|                  | IV      | 15.38 ± 0.89a    | 16.95 ± 1.07a    | 19.36 ± 1.5a     | 14.91 ± 0.58a    | 19.07 ± 0.61a    | 17.45 ± 1.29ns   |
| Tuber<br>(mg/kg) | control | 5.93 ± 0.39bc    | 6.59 ± 0.45ns    | 7.19 ± 0.58ns    | 8.83 ± 0.92b     | 9.2 ± 0.74a      | 10.04 ± 0.96a    |
|                  | I       | 4.98 ± 0.44c     | 7.62 ± 1.25ns    | 8.31 ± 1.23ns    | 7.29 ± 0.78b     | 8.58 ± 0.91ab    | 8.3 ± 1.16b      |
|                  | II      | 6.79 ± 0.37ab    | 7.94 ± 0.38ns    | 6.66 ± 0.7ns     | 11.16 ± 1.04a    | 8.58 ± 0.91ab    | 10.43 ± 0.22ab   |
|                  | III     | 6.54 ± 0.9ab     | 7.3 ± 0.85ns     | 6.73 ± 0.8ns     | 8.45 ± 1.38b     | 7.21 ± 1.08ab    | 10.26 ± 1.33ab   |
|                  | IV      | 6.99 ± 0.31a     | 6.43 ± 1.43ns    | 6.83 ± 1.93ns    | 8.42 ± 0.47b     | 7.97 ± 0.89b     | 8.3 ± 1.16b      |
| Root<br>(mg/kg)  | control | 13.87 ± 1.13a    | 15.3 ± 0.64a     | 12.56 ± 0.46a    | 9.84 ± 0.75b     | 12.13 ± 0.26bc   | 10.91 ± 0.58c    |
|                  | I       | 9.11 ± 0.9c      | 10.96 ± 0.65bc   | 11.73 ± 1.1abc   | 10.41 ± 0.21b    | 13.6 ± 0.74a     | 10.21 ± 1.03c    |
|                  | II      | 9.58 ± 0.2bc     | 9.03 ± 1.61c     | 12.37 ± 0.34ab   | 6.92 ± 0.69c     | 10.94 ± 0.4cd    | 12.71 ± 1.44ab   |
|                  | III     | 14.01 ± 0.13a    | 11.23 ± 1.34b    | 10.8 ± 0.69c     | 13.98 ± 1.42a    | 10.66 ± 1.07d    | 11.58 ± 0.88bc   |
|                  | IV      | 10.6 ± 0.53b     | 15.67 ± 1.03a    | 11.05 ± 0.72bc   | 15.26 ± 0.45a    | 12.88 ± 0.88ab   | 13.62 ± 0.32a    |

Values are demonstrated by means ± SD ( $n = 3$ ). Significant effects of each treatment on values for biomass are denoted by different lowercase letters (one-way ANOVA,  $p < 0.05$ ). T<sub>i-j</sub> means *Bletilla striata* harvested at a certain point ( $i = 1, 2$ , represents the year after transplanting;  $j = 7, 8, 9$ , represents month for sampling).

**Table S5.** Zn content in leaf, shoot, tuber, root of *B. striata* under Cd treatment control, I, II, III and IV.

| Cd treatment     |         | T <sub>1-7</sub> | T <sub>1-8</sub> | T <sub>1-9</sub> | T <sub>2-7</sub> | T <sub>2-8</sub> | T <sub>2-9</sub> |
|------------------|---------|------------------|------------------|------------------|------------------|------------------|------------------|
| Leaf<br>(mg/kg)  | control | 7.88 ± 0.7ab     | 20.4 ± 4.11b     | 47.75 ± 1.17e    | 7.85 ± 1.33ns    | 27.7 ± 1.58bc    | 53.52 ± 1.54c    |
|                  | I       | 6.39 ± 0.58b     | 18.55 ± 0.75b    | 52.81 ± 1.20d    | 7.23 ± 0.04ns    | 26.05 ± 0.53c    | 62.26 ± 0.83b    |
|                  | II      | 6.63 ± 1.18ab    | 29.04 ± 1.02a    | 102.54 ± 1.51a   | 8.34 ± 1.83ns    | 56.36 ± 2.31a    | 75.28 ± 0.73a    |
|                  | III     | 6.89 ± 0.61ab    | 14.29 ± 1.19c    | 85.00 ± 0.58b    | 8.86 ± 0.55ns    | 29.16 ± 0.55b    | 47.63 ± 3.85d    |
|                  | IV      | 8.08 ± 0.79a     | 13.02 ± 1.61c    | 63.31 ± 2.94c    | 8.89 ± 0.74ns    | 19.22 ± 1.07d    | 40.96 ± 4.01e    |
| Shoot<br>(mg/kg) | control | 9.41 ± 0.55ns    | 21.04 ± 0.93b    | 91.39 ± 1.36e    | 7.49 ± 0.62a     | 21.85 ± 2.19c    | 41.49 ± 5.18c    |
|                  | I       | 10.38 ± 1.07ns   | 28.39 ± 0.93a    | 199.02 ± 3.2b    | 6.52 ± 0.64ab    | 44.96 ± 3.32a    | 46.34 ± 2.85c    |
|                  | II      | 8.41 ± 0.87ns    | 28.52 ± 0.26a    | 253.17 ± 4.19a   | 6.73 ± 0.46ab    | 50.33 ± 4.23a    | 67.66 ± 4.8a     |
|                  | III     | 9.42 ± 1.12ns    | 20.57 ± 1.45b    | 156.35 ± 8.07c   | 7.31 ± 0.9a      | 29.36 ± 3.85b    | 58.38 ± 1.04b    |
|                  | IV      | 9.14 ± 1.47ns    | 20.6 ± 1.16b     | 105.81 ± 6.12d   | 5.67 ± 1.12b     | 26.59 ± 0.76bc   | 53.06 ± 2.74b    |
| Tuber<br>(mg/kg) | control | 3.76 ± 1.23b     | 21.94 ± 3.36b    | 50.44 ± 0.47c    | 7.45 ± 0.28b     | 35.53 ± 0.45c    | 56.86 ± 7.49c    |
|                  | I       | 4.71 ± 1.67b     | 23.04 ± 2.72b    | 48.61 ± 2.36c    | 6.22 ± 1.08b     | 65.64 ± 2.65a    | 82.59 ± 1.95a    |
|                  | II      | 8.24 ± 0.20a     | 50.55 ± 2.47a    | 68.48 ± 1.35a    | 12.23 ± 0.93b    | 63.08 ± 3.13a    | 73.46 ± 1.77ab   |
|                  | III     | 6.04 ± 1.35ab    | 22.43 ± 3.3b     | 57.3 ± 3.02b     | 20.39 ± 0.88a    | 61.37 ± 1.59a    | 73.34 ± 4.83ab   |
|                  | IV      | 5.53 ± 1.67b     | 21.6 ± 1.07b     | 52.09 ± 0.79c    | 7.6 ± 0.58b      | 54.64 ± 4.65b    | 64.25 ± 6.7bc    |
| Root<br>(mg/kg)  | control | 15.91 ± 0.97bc   | 74.36 ± 5.45c    | 87.47 ± 4.02b    | 34.43 ± 2.01a    | 140.36 ± 4.23c   | 272.42 ± 4.75b   |
|                  | I       | 13.22 ± 1.56c    | 98.73 ± 2.25a    | 123.48 ± 11.04a  | 20.19 ± 2.77c    | 198.57 ± 3.8a    | 296.09 ± 9.54a   |
|                  | II      | 18.88 ± 0.85a    | 82.95 ± 2.98c    | 71.74 ± 9.59c    | 26.66 ± 2.81b    | 172.93 ± 4.62b   | 214.2 ± 5.95c    |
|                  | III     | 17.09 ± 0.35ab   | 16.26 ± 1.7d     | 71.15 ± 4.83c    | 8.77 ± 2.48d     | 100.34 ± 1.91d   | 139.31 ± 1.71d   |
|                  | IV      | 18.96 ± 0.92a    | 18.88 ± 1.57d    | 58.65 ± 2.09c    | 9.82 ± 1.6d      | 66.16 ± 2.88e    | 101.99 ± 10.72e  |

Values are demonstrated by means ± SD ( $n = 3$ ). Significant effects of each treatment on values for biomass are denoted by different lowercase letters (one-way ANOVA,  $p < 0.05$ ). T<sub>i-j</sub> means *Bletilla striata* harvested at a certain point ( $i = 1, 2$ , represents the year after transplanting;  $j = 7, 8, 9$ , represents the month for sampling).

**Table S6.** Accumulation of K, Mg, Ca and Zn in tuber of *B. striata* under Cd treatment control, I, II, III and IV.

| Cd treatment |         | T <sub>1-7</sub> | T <sub>1-8</sub> | T <sub>1-9</sub> | T <sub>2-7</sub> | T <sub>2-8</sub> | T <sub>2-9</sub> |
|--------------|---------|------------------|------------------|------------------|------------------|------------------|------------------|
| K (µg)       | control | 12.18 ± 2.365a   | 16.16 ± 3.48a    | 17.00 ± 3.53b    | 28.07 ± 5.53a    | 29.13 ± 5.35ab   | 29.81 ± 4.99ab   |
|              | I       | 13.07 ± 3.124a   | 12.37 ± 2.46b    | 20.82 ± 3.69a    | 22.11 ± 4.63ab   | 27.68 ± 4.46ab   | 33.66 ± 3.90ab   |
|              | II      | 10.20 ± 1.573b   | 16.84 ± 3.99a    | 14.95 ± 0.65b    | 25.31 ± 4.63a    | 31.62 ± 2.93ab   | 36.45 ± 6.39a    |
|              | III     | 8.99 ± 1.445c    | 11.49 ± 2.46b    | 12.56 ± 1.74b    | 22.23 ± 2.58ab   | 35.87 ± 7.36a    | 38.64 ± 5.93a    |
|              | IV      | 10.43 ± 2.001b   | 17.56 ± 3.56a    | 20.60 ± 5.09a    | 17.88 ± 3.58b    | 22.68 ± 3.95b    | 23.67 ± 3.01b    |
| Mg (µg)      | control | 1.86 ± 0.22b     | 2.18 ± 0.34ns    | 2.56 ± 0.25ns    | 4.45 ± 1.83ns    | 5.01 ± 1.04ab    | 7.51 ± 1.47a     |
|              | I       | 1.77 ± 0.34b     | 1.93 ± 0.11ns    | 2.59 ± 0.15ns    | 4.51 ± 1.00ns    | 7.36 ± 1.47a     | 5.87 ± 0.59ab    |
|              | II      | 1.75 ± 0.16b     | 2.41 ± 0.46ns    | 3.14 ± 1.74ns    | 5.71 ± 1.00ns    | 6.35 ± 2.04ab    | 6.08 ± 1.47ab    |
|              | III     | 1.72 ± 0.24b     | 2.19 ± 0.35ns    | 2.71 ± 0.85ns    | 4.65 ± 1.00ns    | 5.01 ± 1.33ab    | 4.91 ± 0.95ab    |
|              | IV      | 2.20 ± 0.29a     | 2.19 ± 0.17ns    | 2.67 ± 0.59ns    | 3.59 ± 0.99ns    | 4.21 ± 0.66b     | 4.08 ± 0.10b     |
| Ca (µg)      | control | 4.82 ± 1.11ns    | 6.56 ± 1.63ns    | 7.58 ± 1.64ns    | 19.46 ± 4.57a    | 21.02 ± 3.48ab   | 27.45 ± 4.74a    |
|              | I       | 5.72 ± 1.56ns    | 6.91 ± 2.01ns    | 8.24 ± 2.65ns    | 15.34 ± 2.47b    | 18.95 ± 3.42ab   | 22.35 ± 2.71ab   |
|              | II      | 5.59 ± 1.00ns    | 7.99 ± 1.95ns    | 7.98 ± 0.55ns    | 21.61 ± 4.73a    | 21.80 ± 3.48a    | 24.29 ± 5.57ab   |
|              | III     | 6.41 ± 0.78ns    | 7.44 ± 2.01ns    | 7.61 ± 2.01ns    | 15.17 ± 2.99b    | 13.93 ± 3.86bc   | 18.60 ± 3.96bc   |
|              | IV      | 5.91 ± 1.28ns    | 6.48 ± 1.43ns    | 7.80 ± 1.27ns    | 10.76 ± 2.95c    | 9.26 ± 1.47c     | 10.34 ± 2.01b    |
| Zn (µg)      | control | 3.15 ± 0.78b     | 21.40 ± 3.89b    | 48.29 ± 7.43c    | 14.64 ± 2.483    | 78.95 ± 5.99c    | 134.85 ± 13.58ab |
|              | I       | 4.92 ± 1.00b     | 22.70 ± 2.58b    | 55.81 ± 2.66bc   | 11.96 ± 2.04c    | 145.65 ± 10.46a  | 186.11 ± 10.39a  |
|              | II      | 7.14 ± 1.05a     | 48.60 ± 3.57a    | 77.43 ± 5.63a    | 24.40 ± 5.48b    | 131.81 ± 7.99a   | 155.80 ± 10.48a  |
|              | III     | 5.37 ± 1.11b     | 22.49 ± 1.94b    | 62.38 ± 4.75b    | 34.82 ± 7.37a    | 108.17 ± 11.36b  | 127.63 ± 11.54ab |
|              | IV      | 4.03 ± 0.99b     | 20.750 ± 3.56b   | 54.12 ± 3.10bc   | 9.08 ± 2.00c     | 61.71 ± 8.47d    | 76.39 ± 6.30b    |

Values are demonstrated by means ± SD ( $n = 3$ ). Significant effects of each treatment on values for biomass are denoted by different lowercase letters (one-way ANOVA,  $p < 0.05$ ). T<sub>i-j</sub> means *Bletilla striata* harvested at a certain point ( $i = 1, 2$ , represents the harvest year;  $j = 7, 8, 9$ , represents month for sampling). The Accumulation of K, Mg, Ca and Zn was calculated from Eq.1 The Accumulation = (Nutrient content) × (Dry weight) (Eq.1).
